# Supplementary material for: Significant role of physical transport in the marine carbon monoxide (CO) cycle – Observations in the East Sea (Sea of Japan), the Western North Pacific, and the Bering Sea in summer
Source: Copernicus journal article supplement (doi:10.5194/egusphere-2023-2290), 2023-10-11
Supplement: Supplementary file 1 [file egusphere-2023-2290-supplement.pdf]

Supporting Information for

**Significant contribution of physical transport in Marine Carbon Monoxide Cycles —  
Observations in the East Sea (Sea of Japan), the Western North Pacific, and the  
Bering Sea in summer**

Young Shin Kwon<sup>1</sup>, Tae Siek Rhee<sup>2\*</sup>, Hyun-Cheol Kim<sup>2</sup>, Hyun-Woo Kang<sup>1</sup>

<sup>1</sup> Korea Institute of Ocean Science and Technology; <sup>2</sup> Korea Polar Research Institute

**Contents of this file**

Text S1

Figures S1–S3

Tables S1–S2

**Introduction**

This supporting information provides the supplementary figures and tables concerned with the derivation of Schmidt number of carbon monoxide and the water column structure.

### Text S1. Derivation of $Sc$ for CO

Schmidt number is dimensionless and defined as the ratio of momentum diffusivity to mass diffusivity. The former is expressed with the kinematic diffusivity which is the ratio of the dynamic diffusivity to the density of solution. Although there are several parameterizations for dynamic diffusivity and density of freshwater and seawater, we adopt Korson et al. (1969) and Millero (1974) for calculation of dynamic viscosity and Millero and Poisson (1981) for density. Recently Sharqawy et al. (2010) compiled existing parameterizations for the chemical engineering purpose. The deviation between them was less than 0.1 % for density, while dynamic viscosity varied up to 1.2% at the freezing point of seawater at salinity 35, which may be due to parameterization on the unmeasured value.

Diffusion coefficient for CO was measured by Wise and Houghton (1968) only, which was used by Bates et al. (1995) for calculation of the Schmidt number of CO and seemingly by Conrad et al. (1982), too. Conrad et al. (1982) used the value,  $2.3 \times 10^{-9} \text{ m}^2 \text{ s}^{-1}$ , which was measured at 20°C in freshwater in Wise and Houghton (1968). Several parameterizations for gas diffusivity were provided in literature. Among them Wilke and Chang (1955), Hayduk and Laudie (1974), and Hayduk and Minhas (1982) are often used (e.g., Johnson (2010); Blomquist et al. (2012)). We adopt parameterization by Wise and Houghton (1968), because they used their own experimental results to derive diffusion coefficient. However, we need to modify their values to account for different temperature scale, water vapor pressure, and salt effect as follows: When calculating diffusion coefficients using the Eyring equation (S1), we modified the temperature to the ITS 90 scale, absolute Kelvin temperature of 273.15, and water vapor pressure by Ambrose and Lawrenson (1972).

$$D = B \cdot \exp(-\Delta E_a/RT) \quad (S1)$$

However, it does not include “salt effect” which lowered diffusivity by up to 8% depending on gases (e.g., King and Saltzman (1995)). Following Jähne et al. (1987)'s experiments, we applied the salt effect linearly in parameterization assuming 6% to be lower at salinity 35 than freshwater. Finally we refit the diffusion coefficients with Levenberg-Marquardt method to determine the pre-exponential constant,  $B$ , and activation energy,  $\Delta E_a$ . The results are compared in Table S1 and shown in Figure S1.

To derive the CO Schmidt number we applied the 4th order of polynomial function of temperature in Celsius ( $t$ ) and salinity ( $S$ ) as follows:

$$Sc = A_0 + A_1 t + A_2 t^2 + A_3 t^3 + A_4 t^4 + S(B_0 + B_1 t + B_2 t^2 + B_3 t^3 + B_4 t^4) \quad (S2)$$

The coefficients  $A_i$ 's and  $B_i$ 's are listed in Table S2. The fitting was limited from -2°C to 38°C and 0 to 35 salinity. Deviations from this parameterization for the measurements by Wise and Houghton (1968) and for other parameterizations are compared in Figure S2 in case of fresh water and seawater at salinity 35.

**Table S1.** Comparison of the coefficients of the Eyring equation

|                                                              | Wise and Houghton (1968) | This study            |
|--------------------------------------------------------------|--------------------------|-----------------------|
| Pre-exponent, B ( $\times 10^5 \text{ m}^2 \text{ s}^{-1}$ ) | 4.07( $\pm 0.50$ )       | 4.47( $\pm 0.32$ )    |
| Ea ( $\text{kJ mol}^{-1}$ )                                  | 24.518( $\pm 0.042$ )    | 24.831( $\pm 0.182$ ) |

**Table S2.** Polynomial coefficients in Equation S2

|        | A <sub>0</sub> | A <sub>1</sub> | A <sub>2</sub> | A <sub>3</sub> | A <sub>4</sub> |
|--------|----------------|----------------|----------------|----------------|----------------|
| Coeff. | 2237.12        | -159.444       | 5.70687        | -0.01092382    | 0.00086435     |
|        | B <sub>0</sub> | B <sub>1</sub> | B <sub>2</sub> | B <sub>3</sub> | B <sub>4</sub> |
| Coeff. | 5.68820        | -0.34916       | 0.011238       | -0.00020114    | 1.5289E-06     |

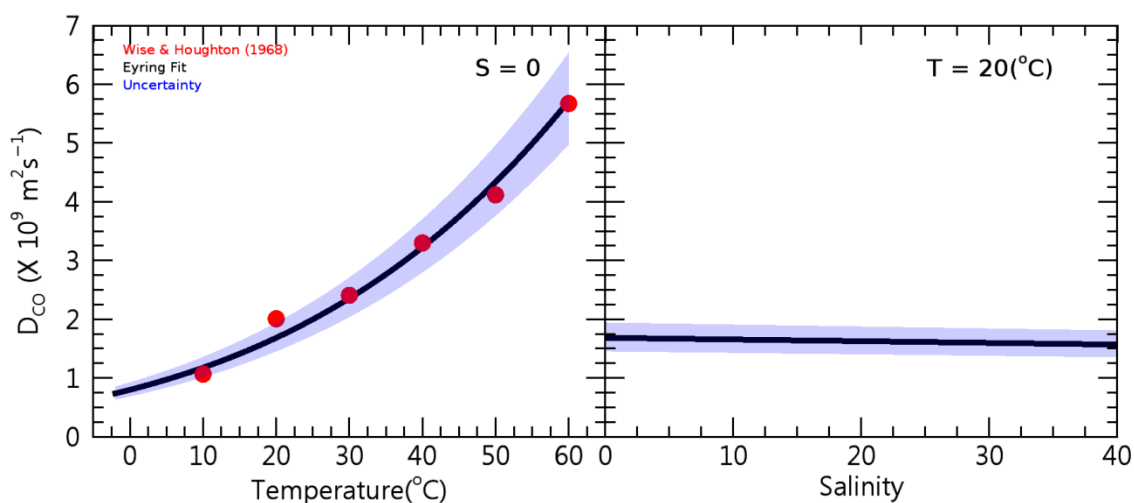**Figure S1.** Diffusion coefficients of CO measured by Wise and Houghton (1968) (red solid circle) and the Eyring fitting (black solid line) to the data against temperature for fresh water (left) and fitting against salinity at 20°C. Blue shade represents uncertainty of the given diffusion coefficients.

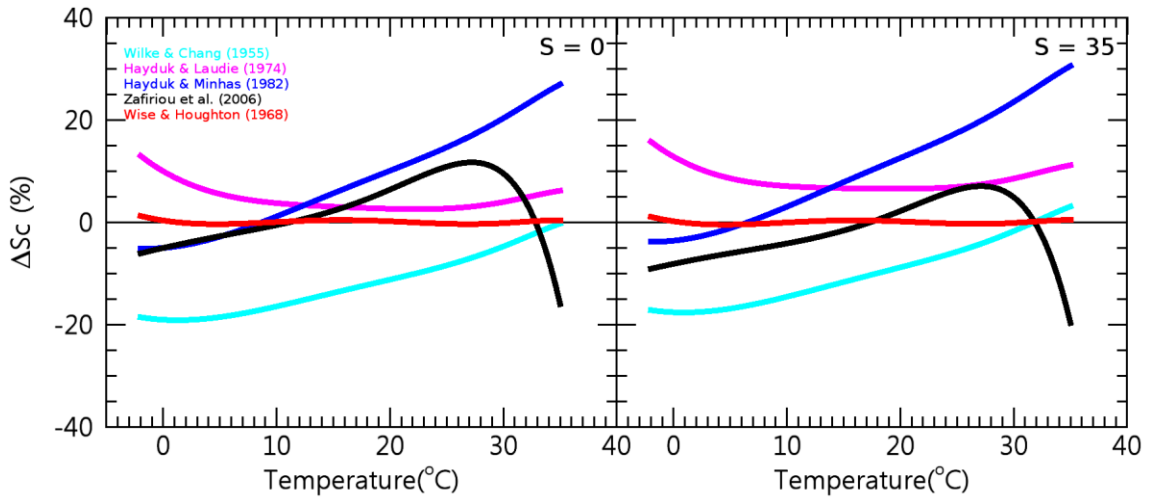

**Figure S2.** Deviations from the Schmidt number described in Eq. S2 and Table S2. Various Sc parameterizations in literature are indexed with matching the color of curves in the left panel.

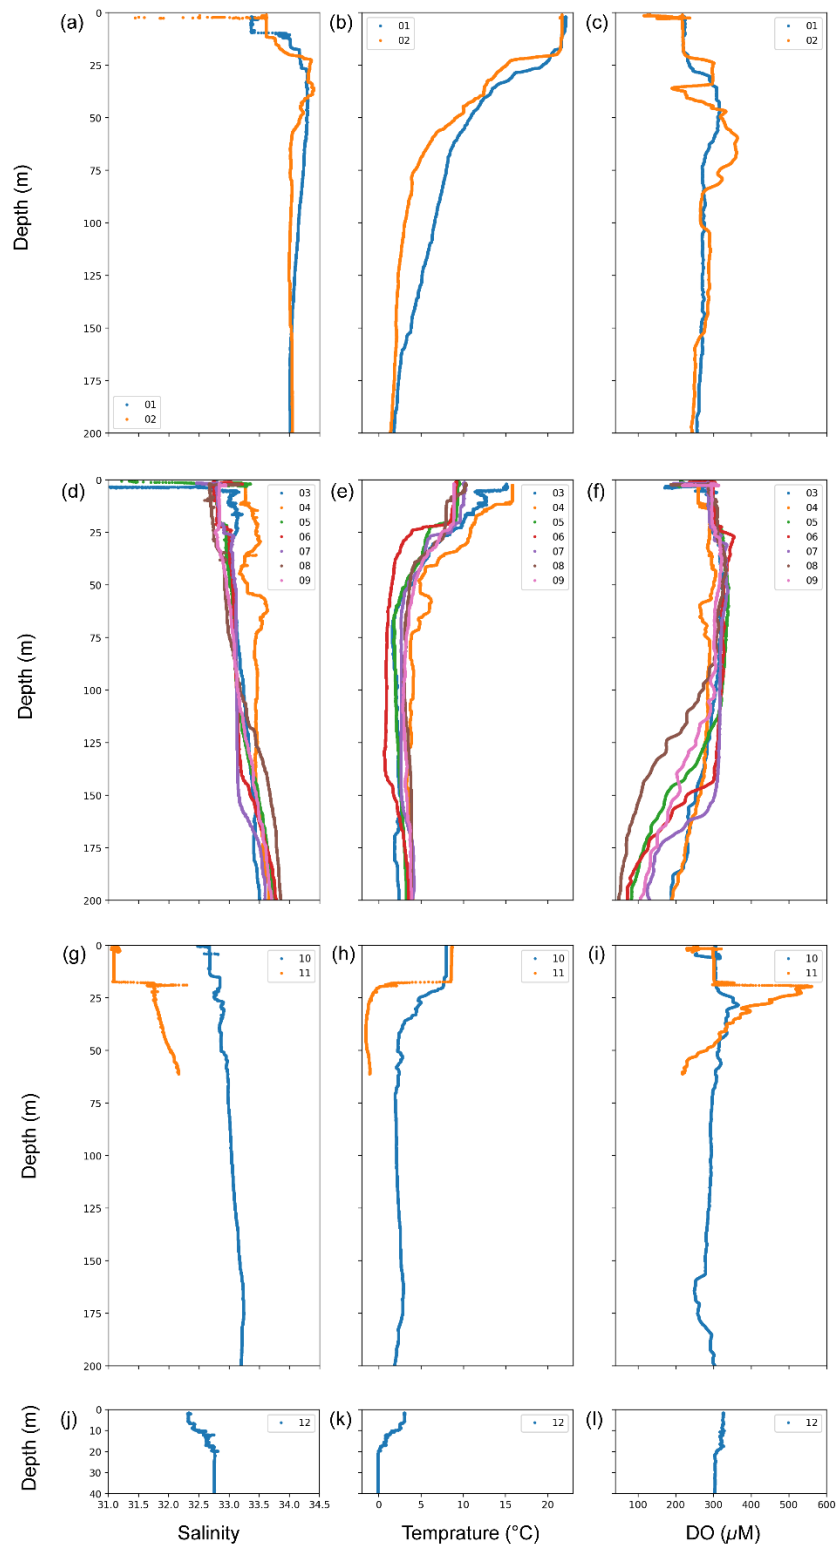

**Figure S3.** Vertical distribution of salinity, water temperature, and DO at the stations of ES (a–c), NP (d–f), and BS (g–i), and at Station 12 (j–l).

## References

- Ambrose, D., and I. J. Lawrenson (1972), The vapour pressure of water, *The Journal of Chemical Thermodynamics*, 4(5), 755-761, doi:[https://doi.org/10.1016/0021-9614\(72\)90049-3](https://doi.org/10.1016/0021-9614(72)90049-3).
- Bates, T. S., K. C. Kelly, J. E. Johnson, and R. H. Gammon (1995), Regional and Seasonal-Variations in the Flux of Oceanic Carbon-Monoxide to the Atmosphere, *J Geophys Res-Atmos*, 100(D11), 23093-23101, doi:Doi 10.1029/95jd02737.
- Blomquist, B. W., C. W. Fairall, B. J. Huebert, and S. T. Wilson (2012), Direct measurement of the oceanic carbon monoxide flux by eddy correlation, *Atmos Meas Tech*, 5(12), 3069-3075, doi:10.5194/amt-5-3069-2012.
- Conrad, R., W. Seiler, G. Bunse, and H. Giehl (1982), Carbon monoxide in seawater (Atlantic Ocean), *Journal of Geophysical Research: Oceans*, 87(C11), 8839-8852.
- Hayduk, W., and H. Laudie (1974), Prediction of diffusion coefficients for nonelectrolytes in dilute aqueous solutions, *AIChE Journal*, 20(3), 611-615, doi:<https://doi.org/10.1002/aic.690200329>.
- Hayduk, W., and B. S. Minhas (1982), Correlations for prediction of molecular diffusivities in liquids, *The Canadian Journal of Chemical Engineering*, 60(2), 295-299, doi:<https://doi.org/10.1002/cjce.5450600213>.
- Jähne, B., G. Heinz, and W. Dietrich (1987), Measurement of the diffusion coefficients of sparingly soluble gases in water, *Journal of Geophysical Research*, 92(C10), doi:10.1029/JC092iC10p10767.
- Johnson, M. T. (2010), A numerical scheme to calculate temperature and salinity dependent air-water transfer velocities for any gas, *Ocean Sci.*, 6(4), 913-932, doi:10.5194/os-6-913-2010.
- King, D. B., and E. S. Saltzman (1995), Measurement of the diffusion coefficient of sulfur hexafluoride in water, *Journal of Geophysical Research: Oceans*, 100(C4), 7083-7088, doi:<https://doi.org/10.1029/94JC03313>.
- Korson, L., W. Drost-Hansen, and F. J. Millero (1969), Viscosity of water at various temperatures, *The Journal of Physical Chemistry*, 73(1), 34-39.
- Millero, F. J. (1974), The physical chemistry of seawater, *Annual Review of Earth and Planetary Sciences*, 2(1), 101-150.
- Millero, F. J., and A. Poisson (1981), International one-atmosphere equation of state of seawater, *Deep Sea Research Part A. Oceanographic Research Papers*, 28(6), 625-629, doi:[https://doi.org/10.1016/0198-0149\(81\)90122-9](https://doi.org/10.1016/0198-0149(81)90122-9).
- Sharqawy, M. H., J. H. Lienhard, and S. M. Zubair (2010), Thermophysical properties of seawater: a review of existing correlations and data, *Desalination and Water Treatment*, 16(1-3), 354-380, doi:10.5004/dwt.2010.1079.
- Wilke, C., and P. Chang (1955), Correlation of diffusion coefficients in dilute solutions, *AIChE journal*, 1(2), 264-270.
- Wise, D., and G. Houghton (1968), Diffusion coefficients of neon, krypton, xenon, carbon monoxide and nitric oxide in water at 10–60 C, *Chemical Engineering Science*, 23(10), 1211-1216.
