# Supplementary material for: Significant role of physical transport in the marine carbon monoxide (CO) cycle – Observations in the East Sea (Sea of Japan), the Western North Pacific, and the Bering Sea in summer
Source: Copernicus journal article supplement (doi:10.5194/egusphere-2023-2290), 2023-10-11
Supplement: Supplementary file [file egusphere-2023-2290-AC1-supplement.zip]

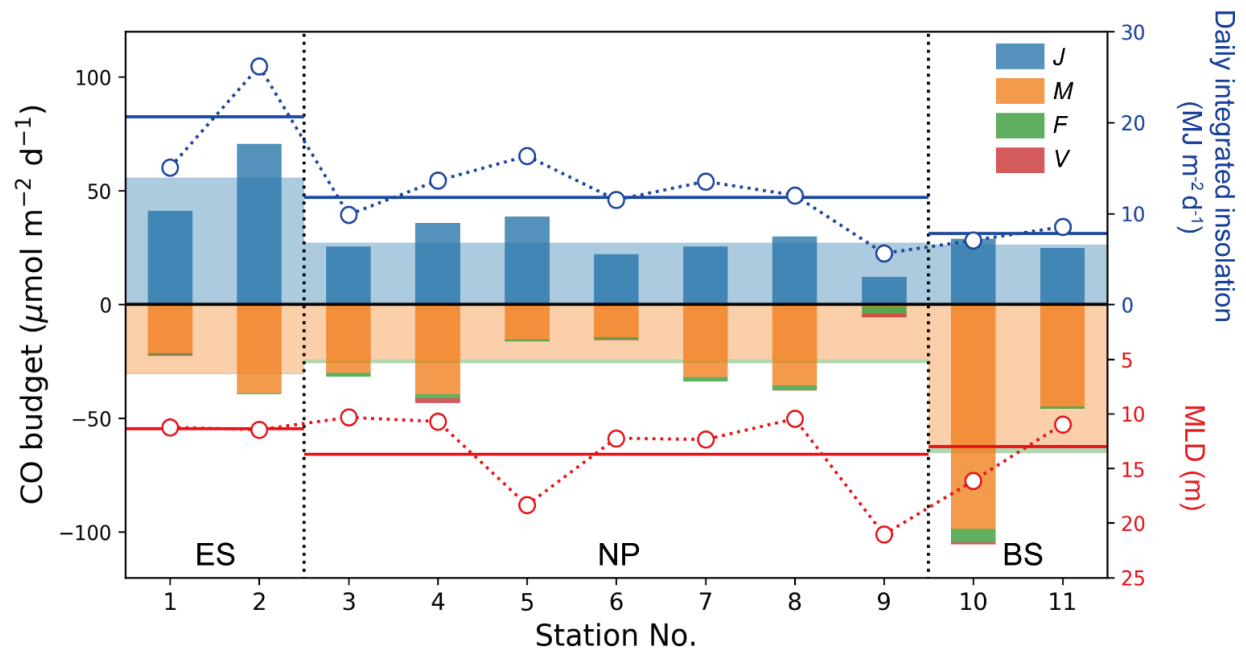

Figure 5. CO budget terms in the mixed layer at each station. Daily photochemical production ( $J$ ), microbial oxidation ( $M$ ), air-sea gas exchange ( $F$ ), and vertical mixing ( $V$ ) are denoted by blue, orange, green, and red bars, respectively. Wide, transparent bars represent the mean values for these processes in the given provinces. Daily-integrated insolation and MLD are represented by respective blue and red open circles with dotted line, and blue and red solid horizontal lines indicate their mean values in the provinces.
