# Supplementary material for: Significant role of physical transport in the marine carbon monoxide (CO) cycle – Observations in the East Sea (Sea of Japan), the Western North Pacific, and the Bering Sea in summer
Source: Copernicus journal article supplement (doi:10.5194/egusphere-2023-2290), 2023-10-11
Supplement: Supplementary file [file egusphere-2023-2290-AC1-supplement.zip]

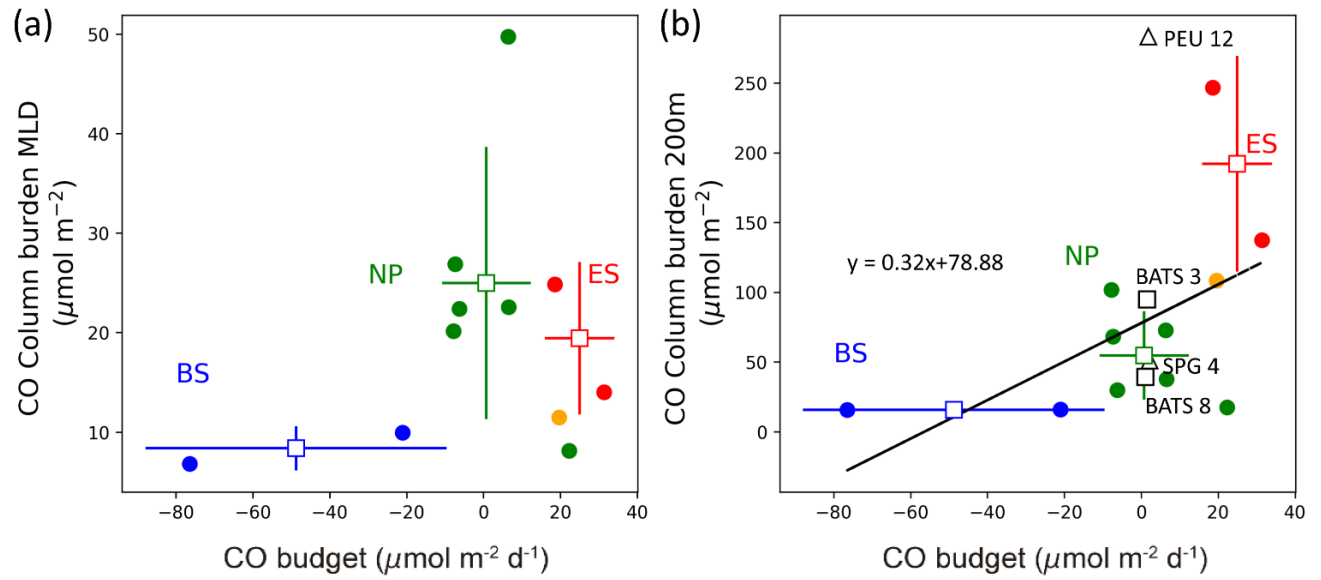

**Figure 7. Comparison of CO column burdens (a) in the mixed layer (CBMLD) and (b) from the surface down to 200 m deep (CB200) against the CO budget in the mixed layer. In (b), black open squares and triangles are from Zafiriou et al. (2008) and Johnson and Bates (1996), respectively, where BATS 3 and 8 refer to Bermuda Atlantic Time-series Study in March and August, respectively, PEU 12 refers to Equatorial Pacific Upwelling region in December; and SPG 4 refers to South Pacific Gyre in April. Orange solid circle in (a) and (b) represents Station 12 off the coast of Nome, Alaska.**
