# Supplementary material for: Significant role of physical transport in the marine carbon monoxide (CO) cycle – Observations in the East Sea (Sea of Japan), the Western North Pacific, and the Bering Sea in summer
Source: Copernicus journal article supplement (doi:10.5194/egusphere-2023-2290), 2023-10-11
Supplement: Supplementary file [file egusphere-2023-2290-AC1-supplement.zip]

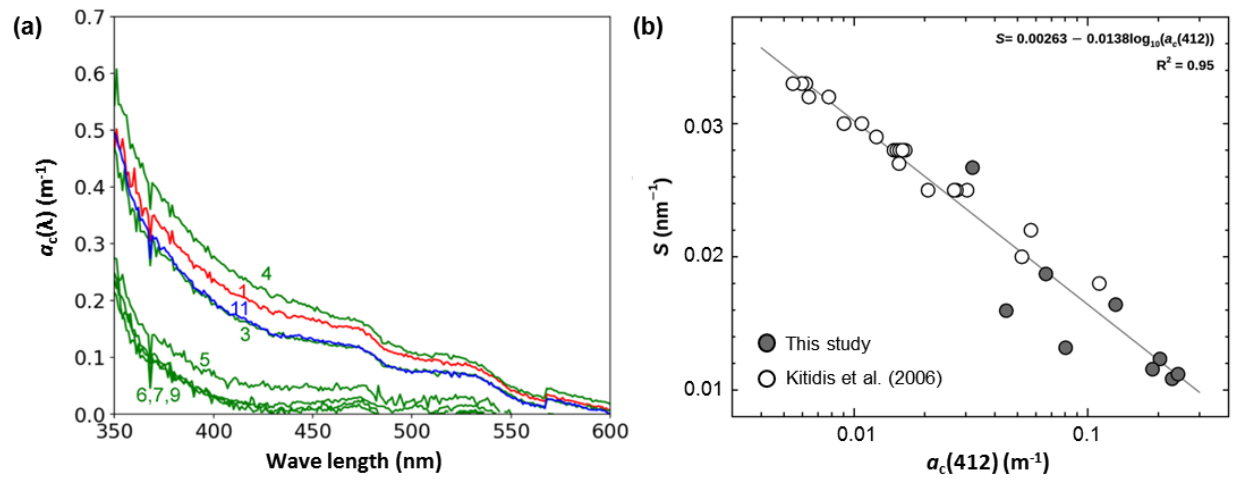

**Figure 3. (a) Spectra of CDOM absorption coefficient ( $a_c(\lambda)$ ) in the surface seawater at the given stations and (b) semi-log scatter plot between the spectral slope ( $S$ ) and the absorption coefficient at the reference wavelength of 412 nm ( $a_c(412)$ ). Numbers in (a) indicate hydrographic stations.**
