# Supplementary material for: Significant role of physical transport in the marine carbon monoxide (CO) cycle – Observations in the East Sea (Sea of Japan), the Western North Pacific, and the Bering Sea in summer
Source: Copernicus journal article supplement (doi:10.5194/egusphere-2023-2290), 2023-10-11
Supplement: Supplementary file [file egusphere-2023-2290-AC1-supplement.zip]

**Table 1. Summary of the observed parameters in the different provinces. Data are presented as the average and standard deviation ( $1\sigma$ ), with the number of measurements or samples indicated in parentheses.**

| Properties (units)                                          | East Sea/Sea of Japan     | North Pacific              | Bering Sea                |
|-------------------------------------------------------------|---------------------------|----------------------------|---------------------------|
| Air temperature ( $^{\circ}\text{C}$ )                      | $20.5 \pm 1.3$ (N = 85)   | $12.0 \pm 2.8$ (N = 140)   | $7.7 \pm 0.5$ (N = 91)    |
| Air pressure (hPa)                                          | $1008.5 \pm 3.9$ (N = 85) | $1006.4 \pm 4.4$ (N = 140) | $1004.5 \pm 4.2$ (N = 91) |
| Relative humidity (%)                                       | $84 \pm 8$ (N = 85)       | $92 \pm 3$ (N = 140)       | $92 \pm 4$ (N = 91)       |
| $U_{10N}^a$ ( $\text{m s}^{-2}$ )                           | $6 \pm 4$ (N = 4791)      | $9 \pm 2$ (N = 10151)      | $8 \pm 2$ (N = 4663)      |
| Irradiance<br>( $\text{MJ m}^{-2} \text{d}^{-1}$ )          | $27.0 \pm 0.4$ (N = 283)  | $11.8 \pm 3.4$ (N = 1024)  | $8.9 \pm 4.6$ (N = 428)   |
| SST <sup>b</sup> ( $^{\circ}\text{C}$ )                     | $21.3 \pm 1.9$ (N = 4755) | $11.8 \pm 3.0$ (N = 10152) | $8.3 \pm 0.3$ (N = 4662)  |
| SSS <sup>b</sup> (psu)                                      | $32.8 \pm 1.2$ (N = 4755) | $32.9 \pm 0.3$ (N = 10152) | $31.9 \pm 1.0$ (N = 4662) |
| <i>Chl-a</i><br>( $\text{mg m}^{-3}$ )                      | $0.7 \pm 0.4$ (N = 4752)  | $0.9 \pm 0.3$ (N = 10152)  | $0.7 \pm 0.4$ (N = 4663)  |
| MLD <sup>b</sup> (m)                                        | $11.4 \pm 0.15$ (N = 2)   | $13.7 \pm 4.3$ (N = 6)     | $12.7 \pm 3.7$ (N = 2)    |
| $a_c(412)^c$ ( $\text{m}^{-1}$ )                            | $0.21$ (N = 1)            | $0.16 \pm 0.16$ (N = 6)    | $0.17$ (N = 1)            |
| $k_{\text{CO}}^c$ ( $\text{hr}^{-1}$ )                      | $0.27 \pm 0.05$ (N = 2)   | $0.13 \pm 0.15$ (N = 4)    | $0.36 \pm 0.39$ (N = 2)   |
| $[\text{CO}]_{\text{sea}}$ (nM)                             | $0.5 \pm 0.4$ (N = 80)    | $0.6 \pm 0.4$ (N = 140)    | $1.6 \pm 1.3$ (N = 91)    |
| $\text{CO}_{\text{air}}$ ( $\text{nmol mol}^{-1}$ )         | $141 \pm 38$ (N = 85)     | $112 \pm 29$ (N = 99)      | $102 \pm 10$ (N = 74)     |
| SA <sup>b</sup>                                             | $3.1 \pm 2.7$ (N = 80)    | $5.0 \pm 4.4$ (N = 99)     | $14.3 \pm 13.8$ (N = 74)  |
| Air-sea CO flux<br>( $\mu\text{mol m}^{-2} \text{d}^{-1}$ ) | W92 <sup>d</sup>          | $0.8 \pm 0.9$ (N = 80)     | $2.2 \pm 3.0$ (N = 99)    |
|                                                             | N00 <sup>e</sup>          | $0.7 \pm 0.8$ (N = 80)     | $1.7 \pm 2.3$ (N = 99)    |
|                                                             | W14 <sup>f</sup>          | $0.6 \pm 0.8$ (N = 80)     | $1.7 \pm 2.4$ (N = 99)    |

<sup>a</sup> Neutral wind speed at 10 m high.

<sup>b</sup> SST, SSS, MLD, and SA stand for sea surface temperature, sea surface salinity, mixed layer depth, and saturation anomaly, respectively.

<sup>c</sup>  $a_c(412)$  and  $k_{\text{CO}}$  designate absorption coefficient of CDOM at the wavelength of 412 nm and microbial oxidation constant, respectively.

<sup>d,e,f</sup> Gas transfer velocity parameterizations by Wanninkhof (1992), Nightingale et al. (2000), and Wanninkhof (2014), respectively.
